# Supplementary material for: Molecular Differences Based on Erythrocyte Fatty Acid Profile to Personalize Dietary Strategies between Adults and Children with Obesity
Source: MDPI journal article supplement (doi:10.3390/metabo11010043), 2021-01-08
Supplement: s1 [file s1]

Color Key

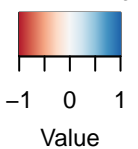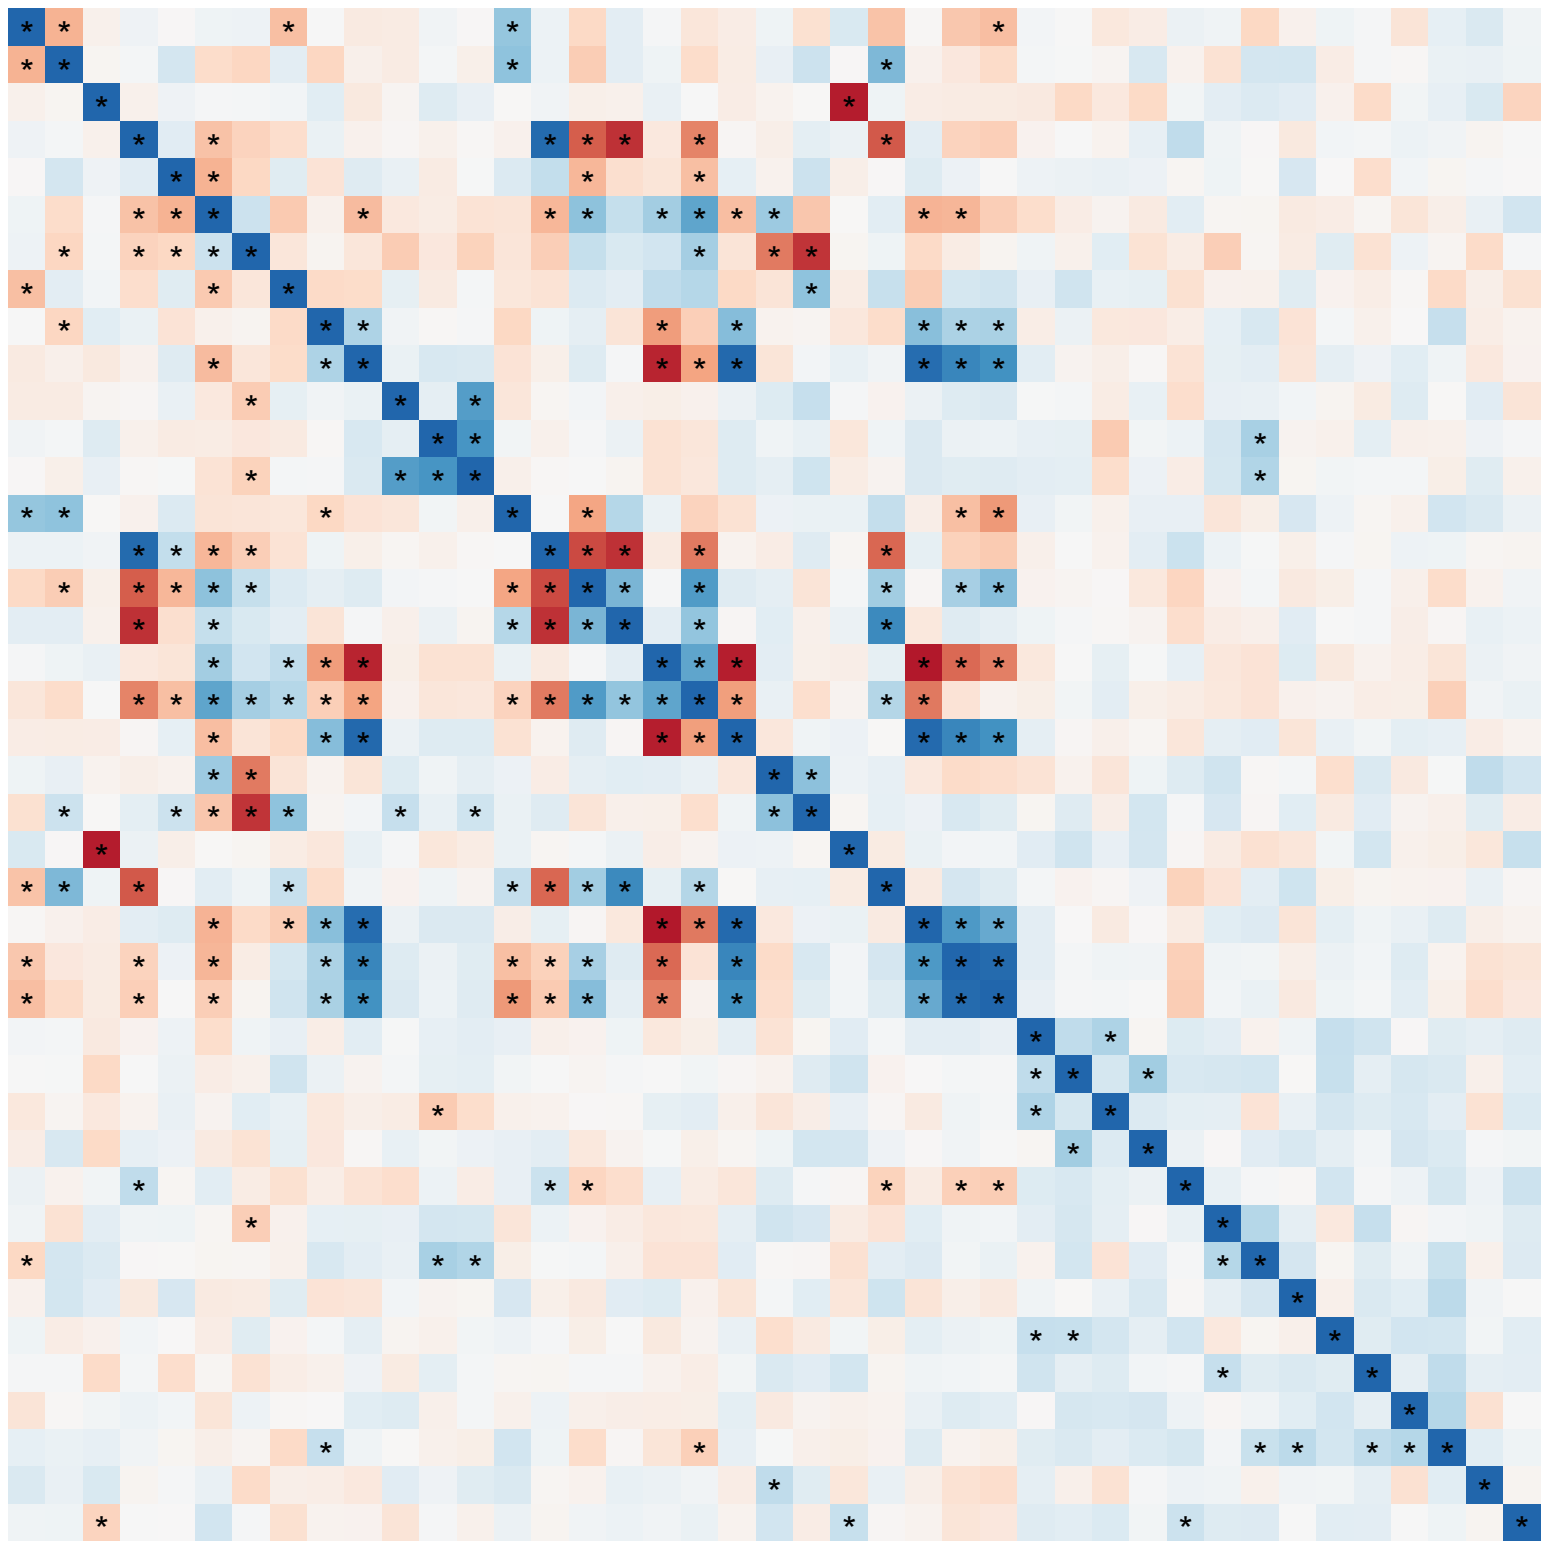

16:0  
18:0  
16:1(9c)  
18:1(9c)  
18:1(11c)  
18:2  
20:3  
20:4  
20:5  
22:6  
18:1 trans  
20:4 trans  
Total Trans FA  
Total SFA  
Total MUFA  
Total PUFA  
SFA/MUFA  
Omega-6/Omega-3  
TOT Omega6  
TOT Omega3  
D6D ELO  
D5D 20:4  
D9D 16:0  
D9D 18:0  
PUFA Balance  
Peroxidation Index  
Unsaturation Index  
Frutas (g/day)  
Vegetables (g/day)  
Cereals (g/day)  
Legumes (g/day)  
Olive oil (g/day)  
Dairy products (g/day)  
Eggs (g/day)  
Red meat (g/day)  
White meat (g/day)  
Nuts (g/day)  
White fish (g/day)  
Oily fish (g/day)  
Drinks (g/day)  
Juices (g/day)

16:0  
18:0  
16:1(9c)  
18:1(9c)  
18:1(11c)  
18:2  
20:3  
20:4  
20:5  
22:6  
18:1 trans  
20:4 trans  
Total Trans FA  
Total SFA  
Total MUFA  
Total PUFA  
SFA/MUFA  
Omega-6/Omega-3  
TOT Omega6  
TOT Omega3  
D6D ELO  
D5D 20:4  
D9D 16:0  
D9D 18:0  
PUFA Balance  
Peroxidation Index  
Unsaturation Index  
Frutas (g/day)  
Vegetables (g/day)  
Cereals (g/day)  
Legumes (g/day)  
Olive oil (g/day)  
Dairy products (g/day)  
Eggs (g/day)  
Red meat (g/day)  
White meat (g/day)  
Nuts (g/day)  
White fish (g/day)  
Oily fish (g/day)  
Drinks (g/day)  
Juices (g/day)
