# Supplementary figures and images for: Molecular Differences Based on Erythrocyte Fatty Acid Profile to Personalize Dietary Strategies between Adults and Children with Obesity
Source: MDPI journal article supplement (doi:10.3390/metabo11010043), 2021-01-08

Color Key

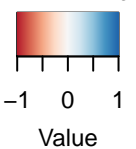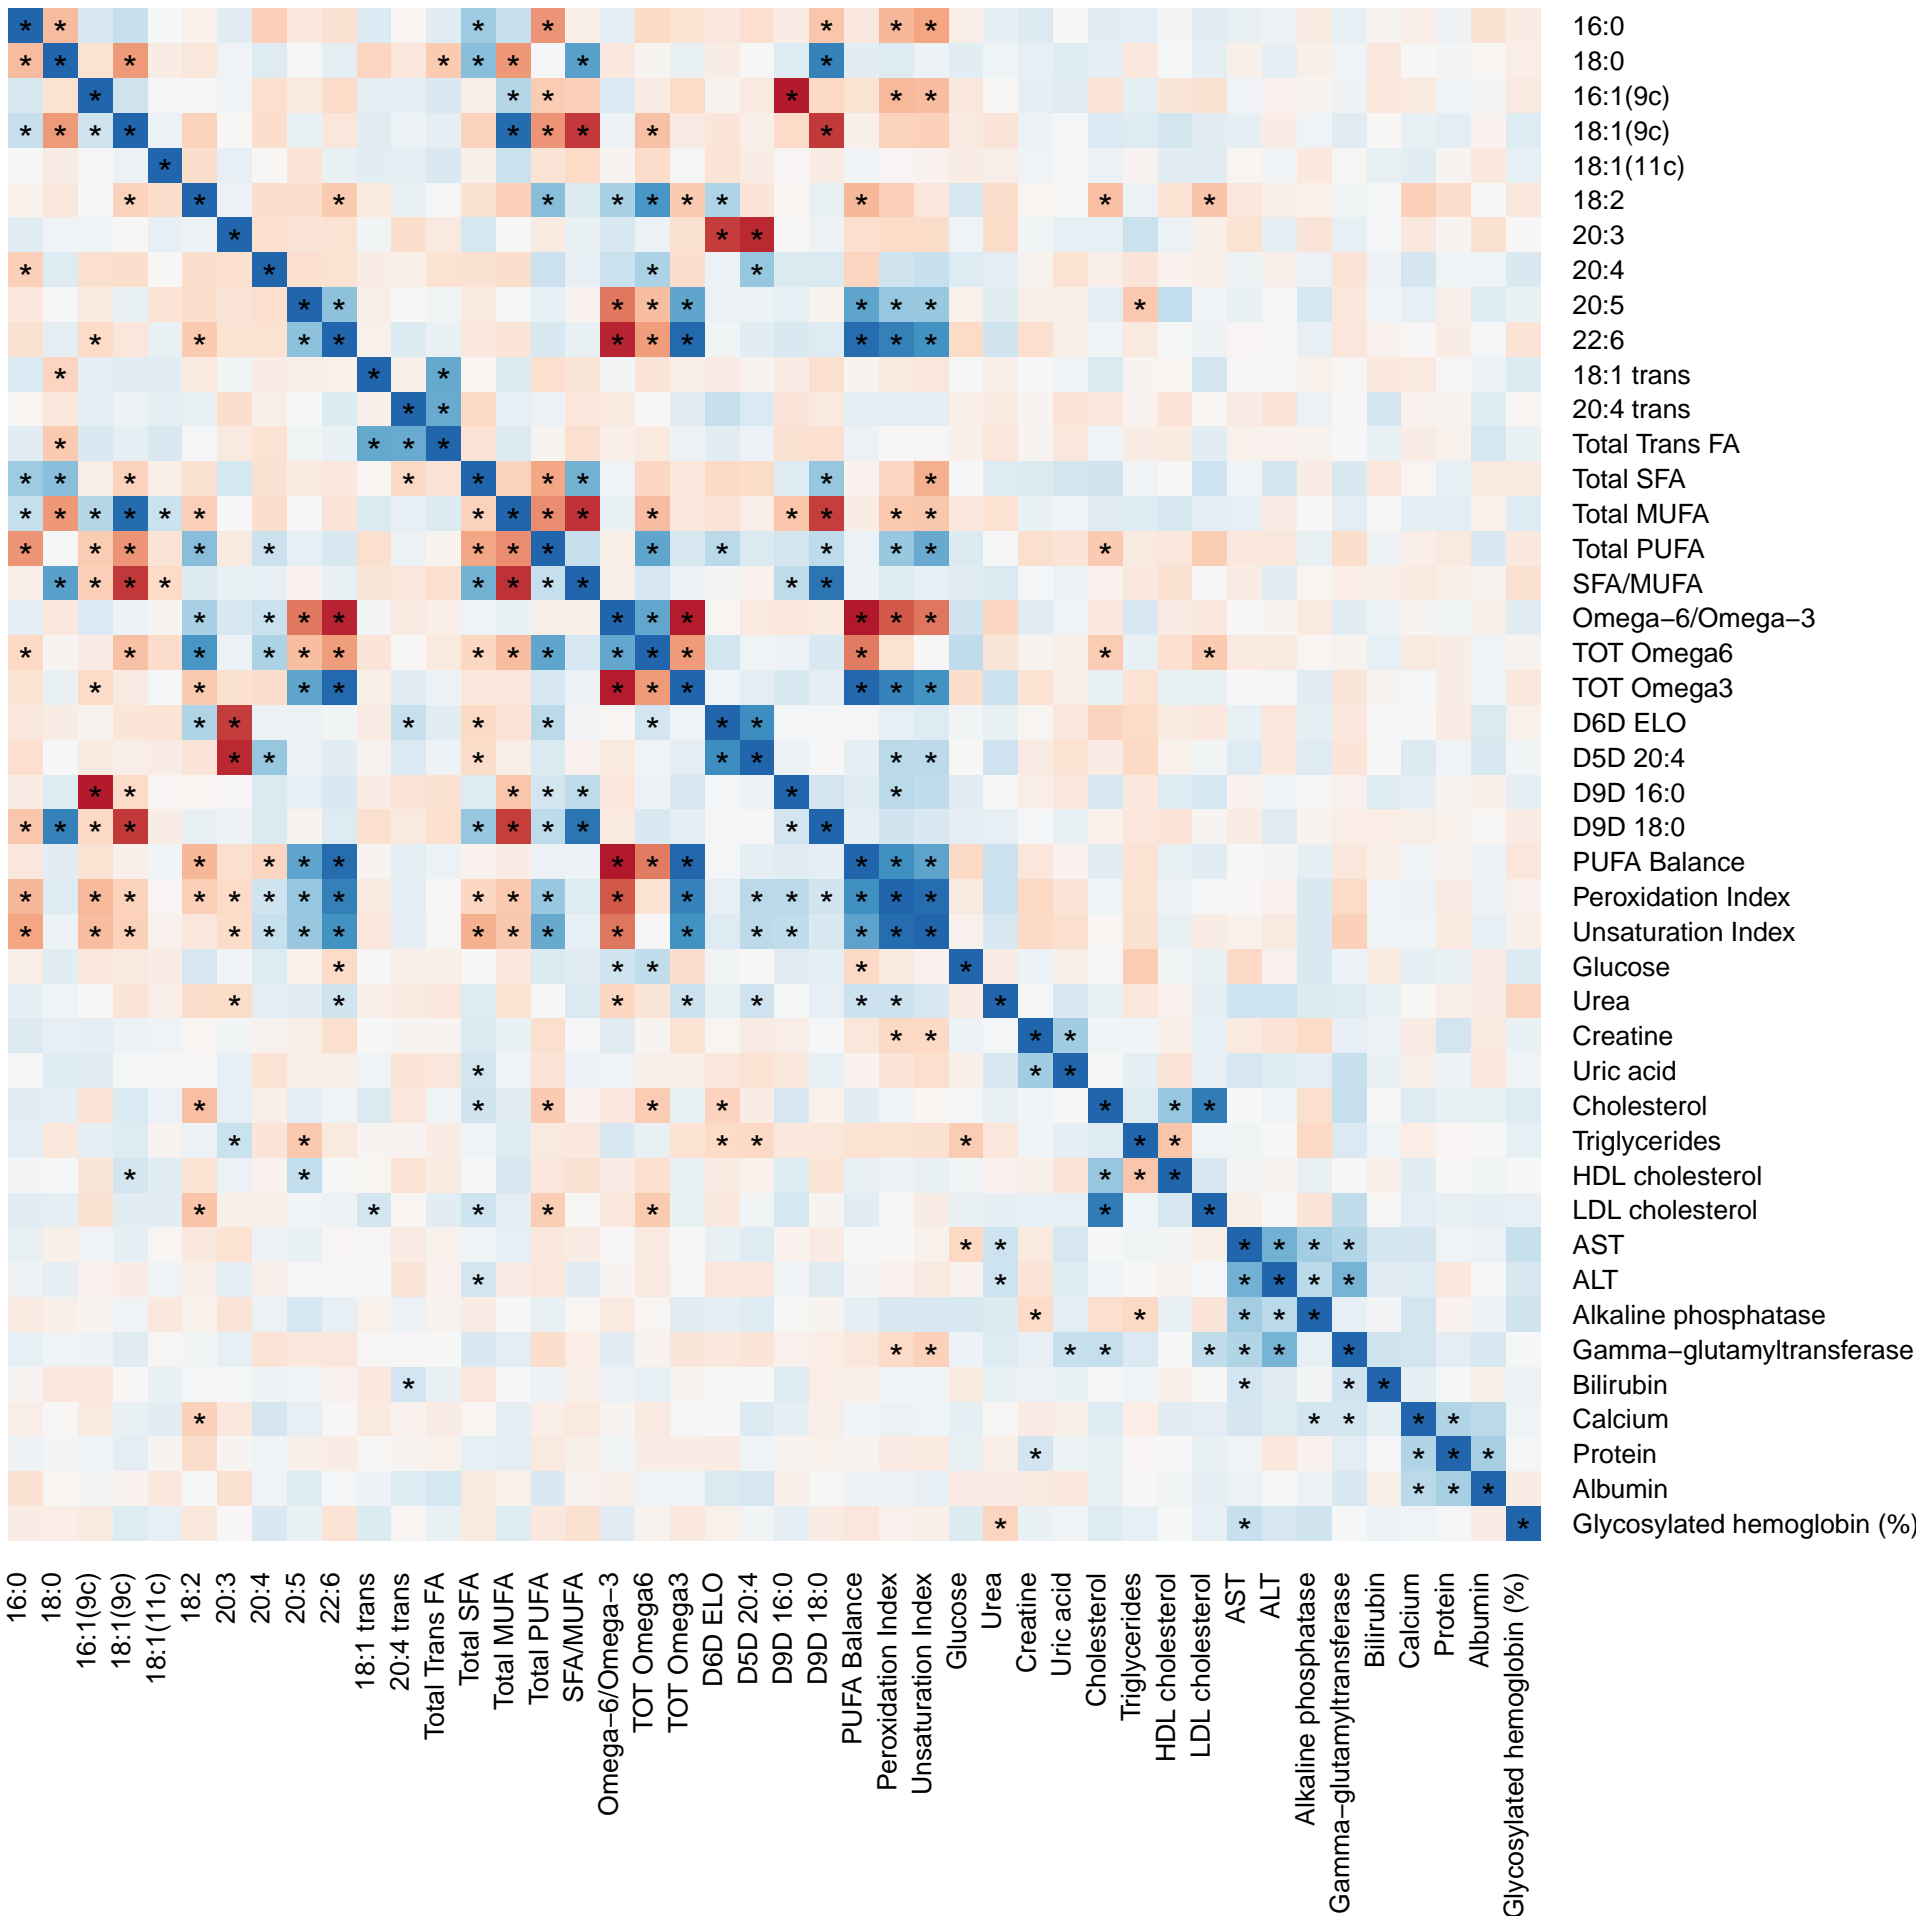

Supplement: s1 [file s1]

Color Key

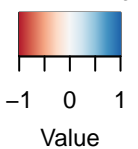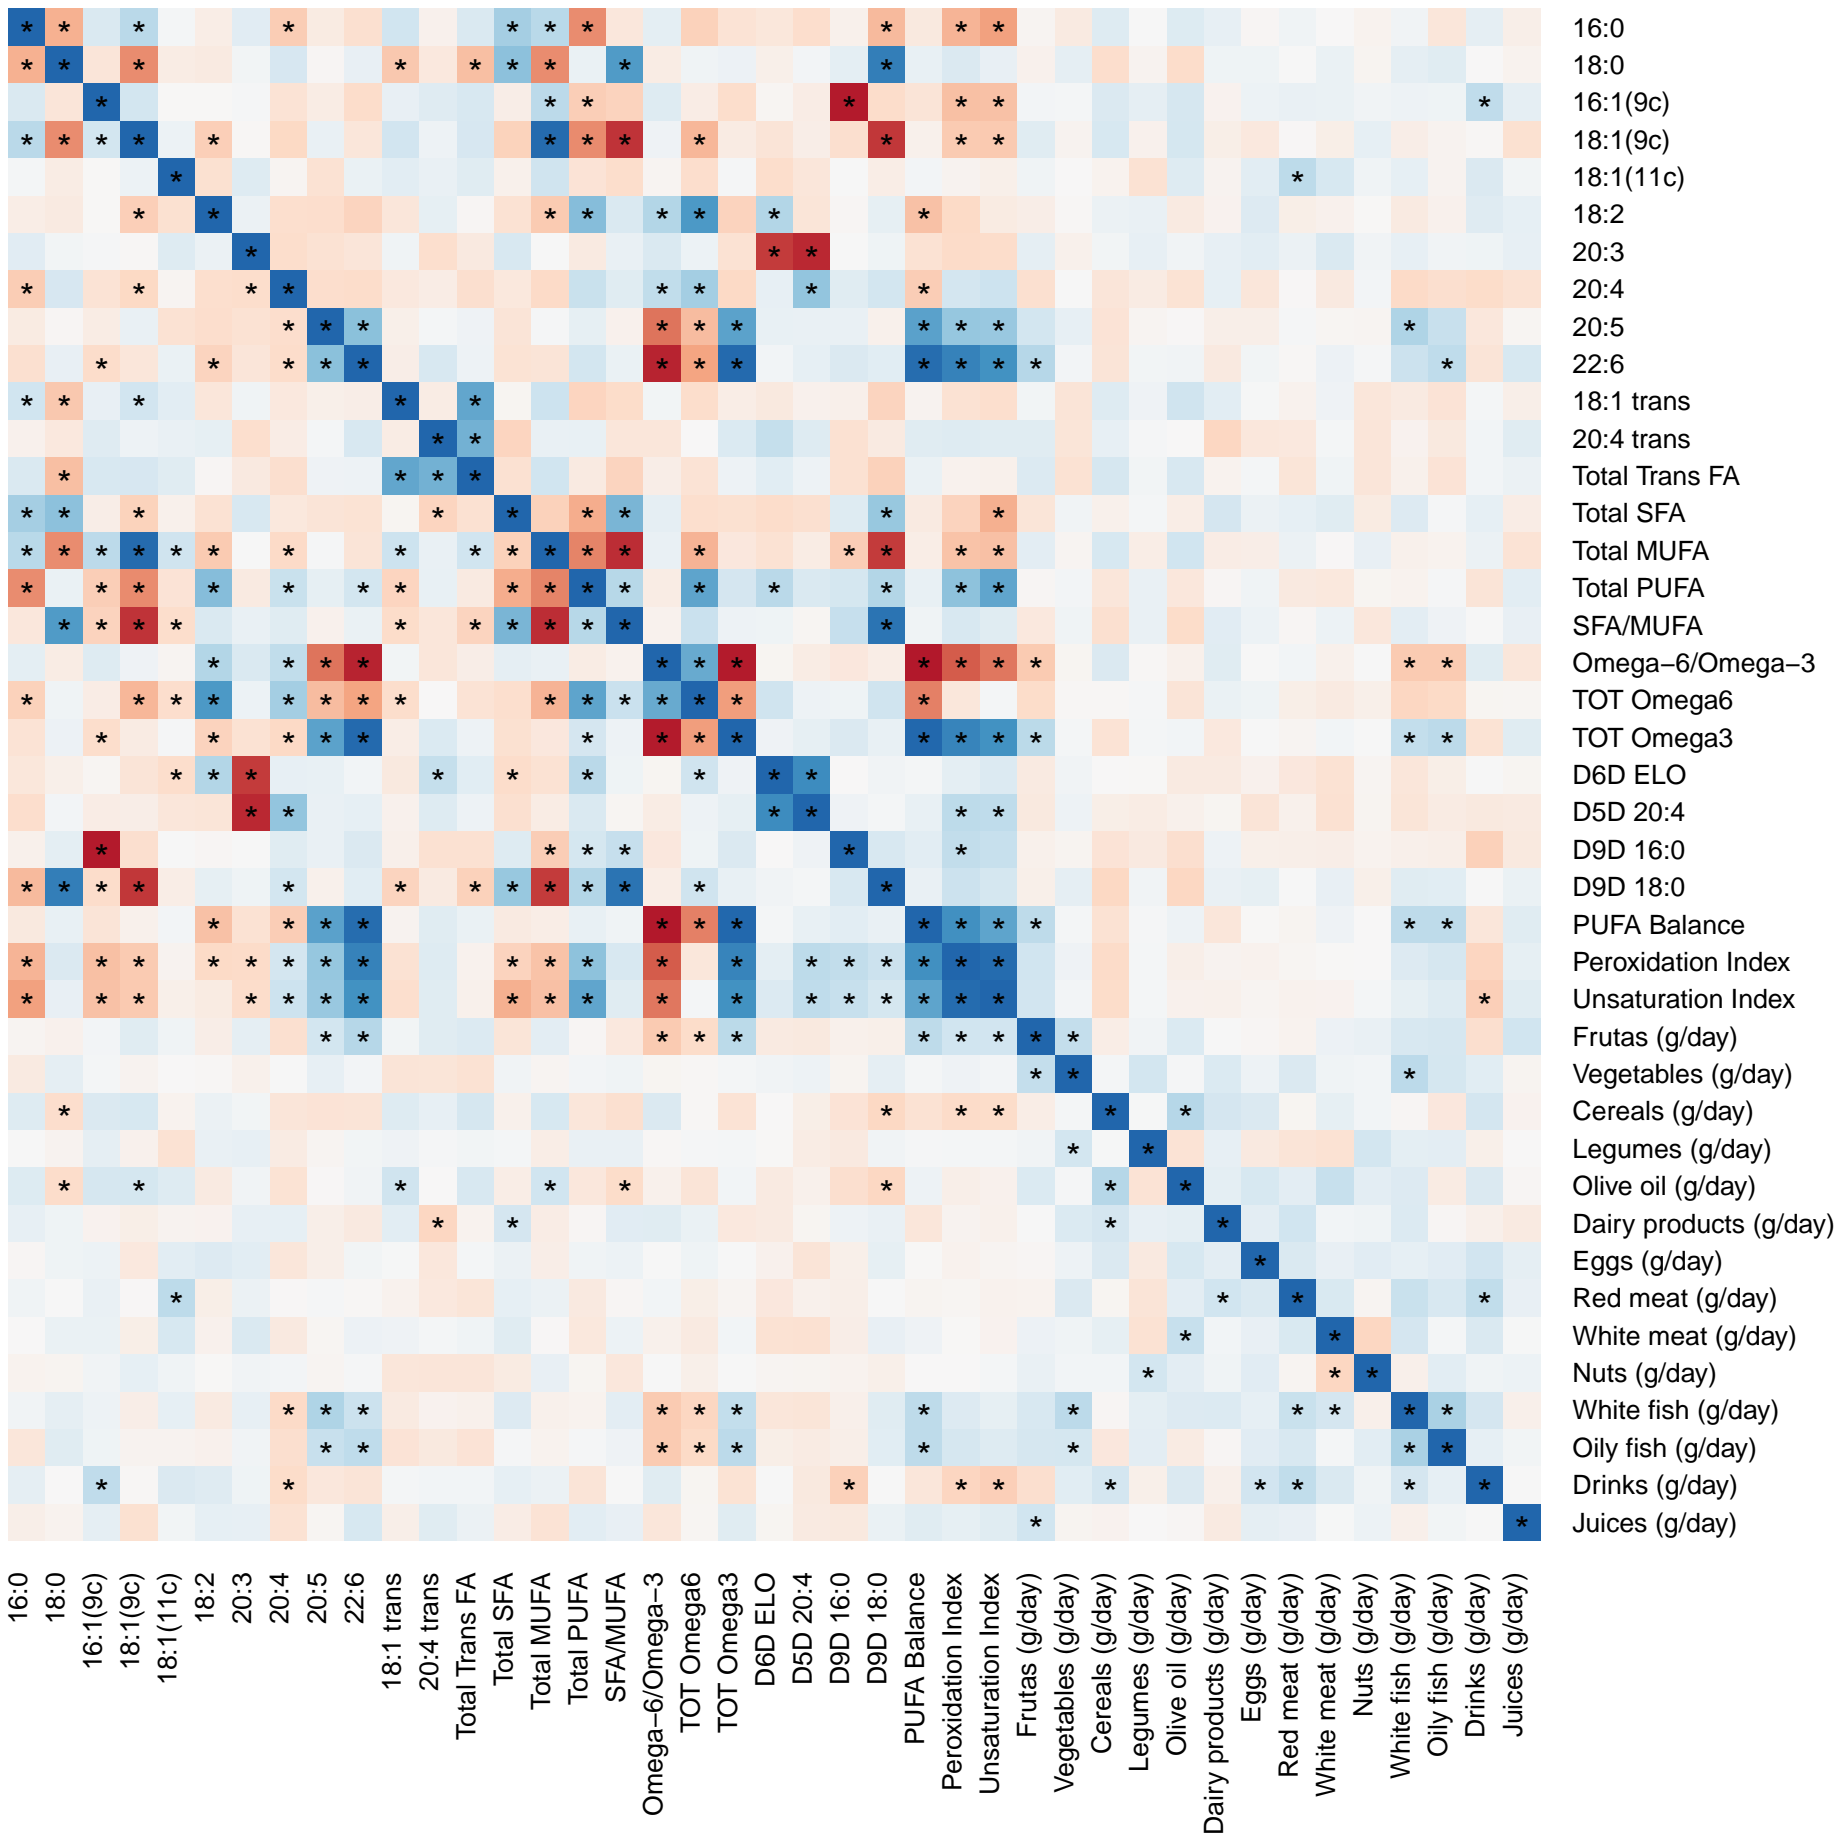

Supplement: s1 [file s1]
